# Supplementary material for: The Association between Direct Oral Anticoagulants Prescribing Behavior and Non-Valvular Atrial Fibrillation Outcomes: An Instrumental Variable Analysis of Real-World Data
Source: MDPI journal article supplement (doi:10.3390/jcm12227190), 2023-11-20
Supplement: s1 [file s1]

**Table S1. Baseline demographic and clinical characteristics of patients (N = 61,155), by actual treatment received.**

|                                                           | Actual Treatment Received |                             | Total<br>(N = 61,155) |
|-----------------------------------------------------------|---------------------------|-----------------------------|-----------------------|
|                                                           | Apixaban<br>(N = 44,371)  | Rivaroxaban<br>(N = 16,784) |                       |
| Mean age (SD)                                             | 73.2 (9.8)                | 71.1 (10.2)                 | 72.6 (9.9)            |
| <b>Sex</b>                                                |                           |                             |                       |
| Female                                                    | 19,578 (44.1%)            | 6604 (39.3%)                | 26,182 (42.8%)        |
| Male                                                      | 24,793 (55.9%)            | 10,180 (60.7%)              | 34,973 (57.2%)        |
| <b>Race</b>                                               |                           |                             |                       |
| Black                                                     | 2454 (5.5%)               | 849 (5.1%)                  | 3303 (5.4%)           |
| White                                                     | 34,880 (78.6%)            | 13,129 (78.2%)              | 48,009 (78.5%)        |
| Other                                                     | 394 (0.9%)                | 137 (0.8%)                  | 531 (0.9%)            |
| Unknown                                                   | 6643 (15.0%)              | 2669 (15.9%)                | 9312 (15.2%)          |
| <b>Ethnicity</b>                                          |                           |                             |                       |
| Hispanic                                                  | 1167 (2.6%)               | 425 (2.5%)                  | 1592 (2.6%)           |
| Not Hispanic                                              | 33,592 (75.7%)            | 12,393 (73.8%)              | 45,985 (75.2%)        |
| Unknown                                                   | 9612 (21.7%)              | 3966 (23.6%)                | 13,578 (22.2%)        |
| <b>Insurance Type</b>                                     |                           |                             |                       |
| Commercial                                                | 3108 (7.0%)               | 1278 (7.6%)                 | 4386 (7.2%)           |
| Medicaid                                                  | 145 (0.3%)                | 69 (0.4%)                   | 214 (0.3%)            |
| Medicare                                                  | 15,152 (34.1%)            | 5465 (32.6%)                | 20,617 (33.7%)        |
| Multiple                                                  | 10,750 (24.2%)            | 3805 (22.7%)                | 14,555 (23.8%)        |
| Other                                                     | 14,044 (31.7%)            | 5759 (34.3%)                | 19,803 (32.4%)        |
| Unknown                                                   | 1172 (2.6%)               | 408 (2.4%)                  | 1580 (2.6%)           |
| Mean body mass index (SD)                                 | 30.3 (6.9)                | 31.1 (7.0)                  | 30.5 (6.9)            |
| Median Charlson Comorbidity Index (IQR)                   | 0 (0–2)                   | 0 (0–2)                     | 0 (0–2)               |
| Median CHA <sub>2</sub> DS <sub>2</sub> -VASc score (IQR) | 4 (2–5)                   | 3 (2–4)                     | 3 (2–5)               |
| Median Modified HAS-BLED score (IQR)                      | 2 (2–3)                   | 2 (1–3)                     | 2 (2–3)               |

Abbreviations: IQR, interquartile range; SD, standard deviation
